# Supplementary material for: Lasso-grafting of macrocyclic peptide pharmacophores yields multi-functional proteins
Source: PubMed Central journal article supplement (PMC7943567; doi:10.1038/s41467-021-21875-0), 2021-03-09
Supplement: 41467_2021_21875_MOESM1_ESM.pdf [file 41467_2021_21875_MOESM1_ESM.pdf]

## **Supplementary Information**

# Supplementary Figures

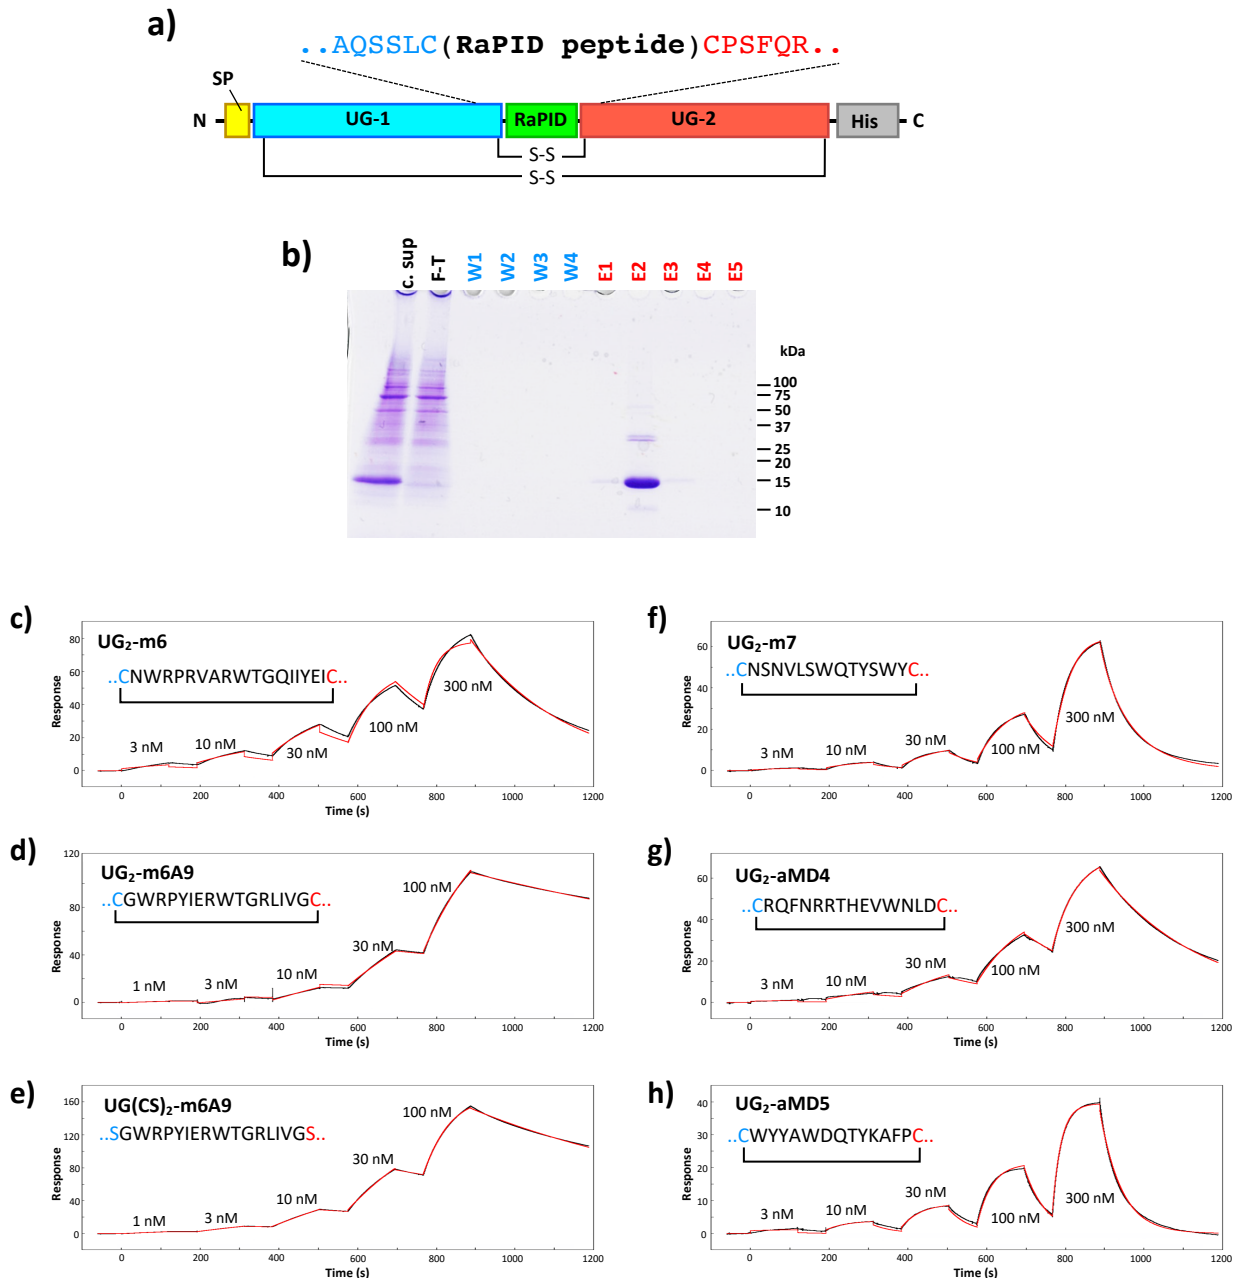

**Supplementary Figure S1.** Peptide grafting onto homodimeric uteroglobin. **a**, Construct design of peptide grafts onto UG. The construct is comprised of a signal peptide (SP), the first UG subunit (UG-1), the grafted RaPID-derived peptide, the second UG subunit (UG-2), and a (His)<sub>6</sub> tag. Disulfide bonding patterns are indicated by brackets. **b**, Purification of peptide-grafted UG tandem dimers using Ni-NTA-agarose chromatography. A representative nonreducing SDS-PAGE (15-25% gradient gel) is shown for samples taken during the purification of m6-grafted UG (UG<sub>2</sub>-m6). Samples include the original culture supernatant (c. sup), the flow-through fraction (F-T), TBS wash fractions (W1-W4), and 0.25 M imidazole elution fractions (E1-E5). **c-h**, Biacore sensorgrams from kinetic binding analyses of peptide-grafted UGs. Samples were serially diluted to the indicated concentrations and successively flowed over sensorchips with immobilized ectodomain fragments of PlxnB1 (**c-f**) or MET (**g, h**) in the “single-cycle kinetics” mode to derive kinetic rate constants shown in Fig. 1c. The actual amino acid sequences of the grafted peptide is shown below each sample name. Note that the peptide-flanking cysteines are mutated to serines in UG(CS)<sub>2</sub>-m6A9 (**e**). The sensorgrams and the fitted curves are shown in black and red lines, respectively.

a)

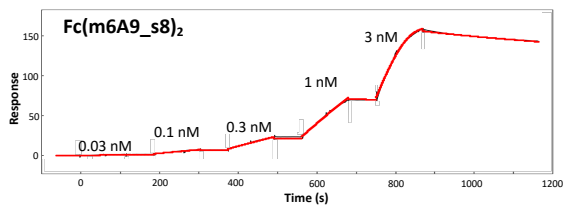

b)

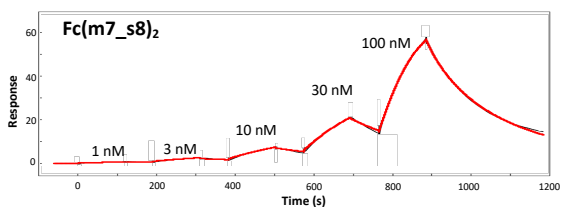

c)

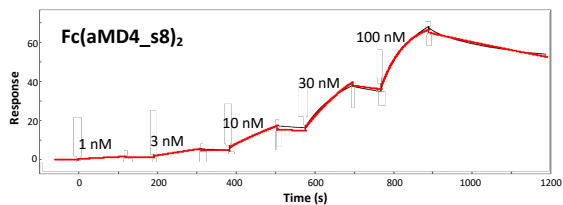

**Supplementary Figure S2.** Binding ability of peptide-grafted Fc proteins. **a-c**, Biacore sensorgrams for the kinetic binding analyses of the indicated peptide-grafted Fcs. Samples were serially diluted to the indicated concentrations and successively flowed over sensorchips with immobilized ectodomain fragments of PlxnB1 (**a,b**) or MET (**c**) in "single-cycle kinetics" mode to derive the kinetic rate constants shown in Fig. 1c. Note that the kinetic constants derived from these curve fitting do not reflect true 1:1 affinity due to the divalent nature of the Fc grafts.

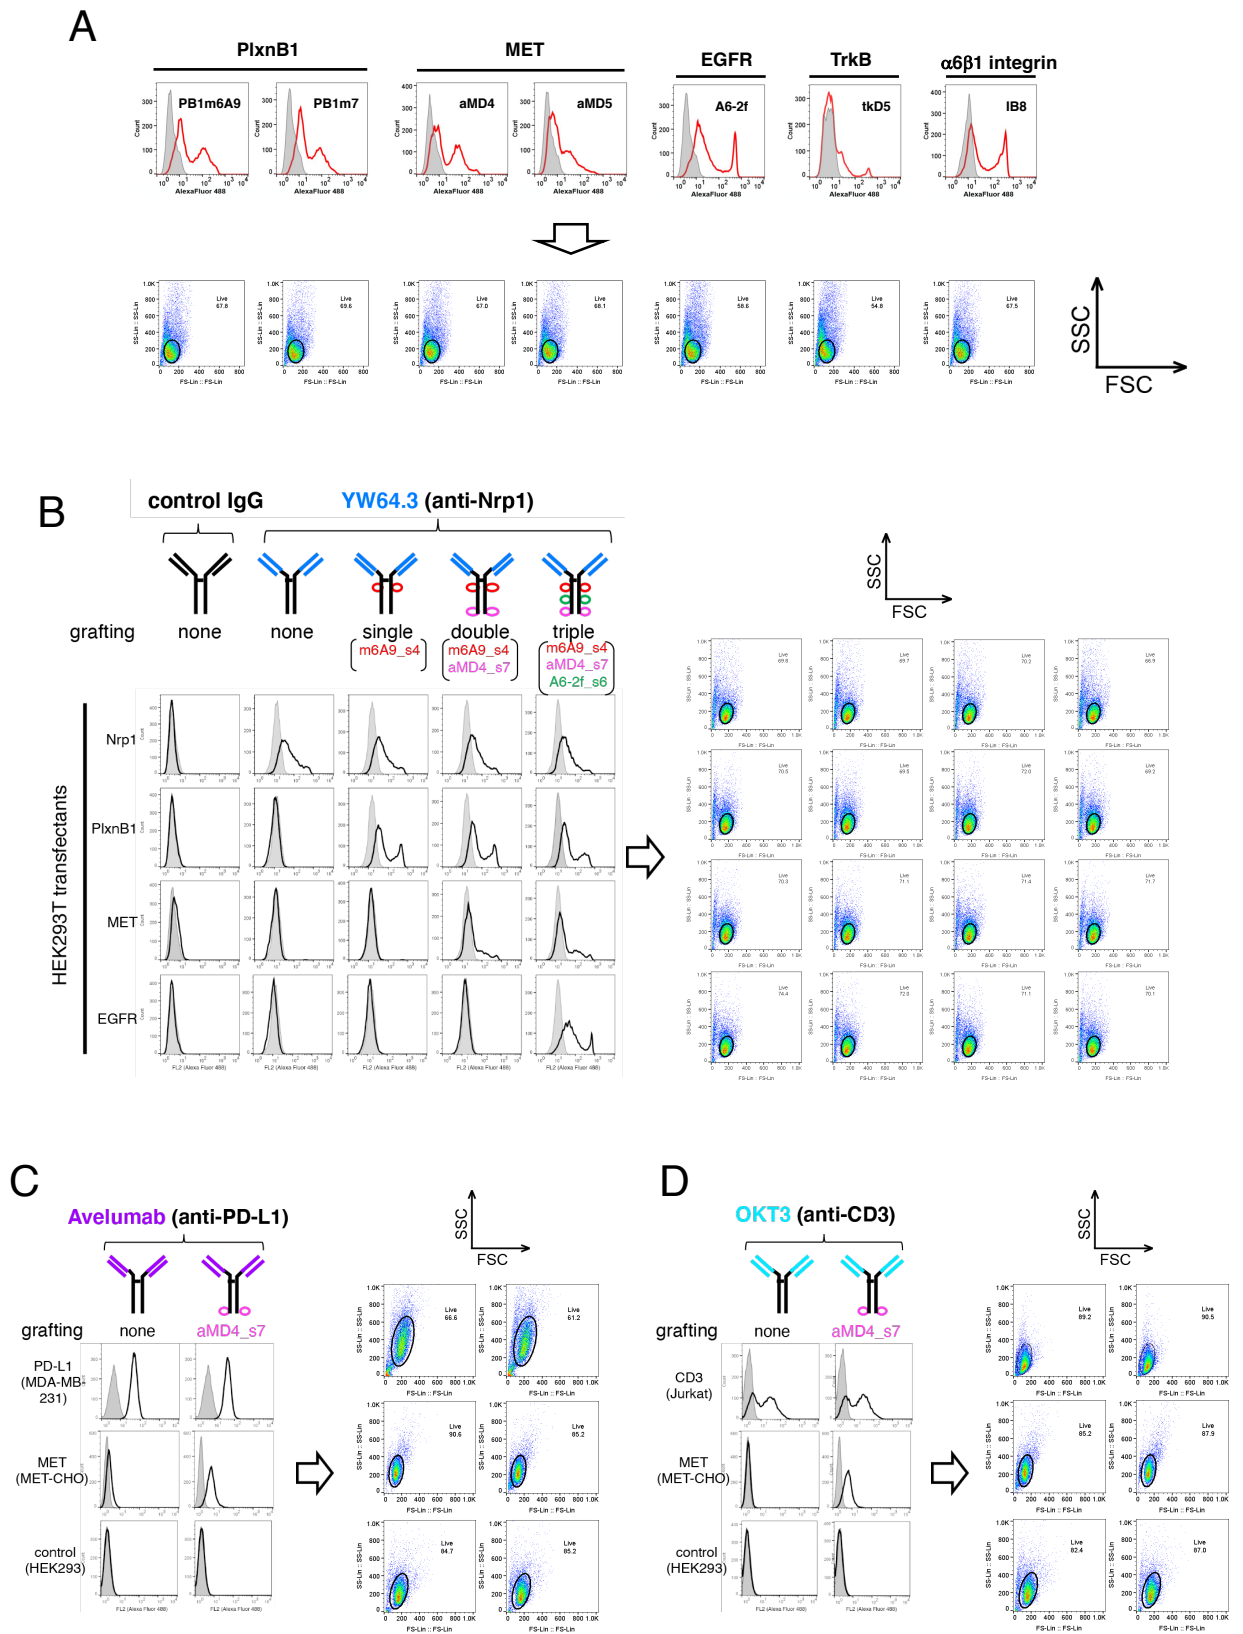

**Supplementary Fig. S3. Flow cytometry gating strategies**

Scatterplots showing live cell gating (black ovals) for each histogram panel in (A) peptide-grafted Fc binding to receptor-expressing 293T cells (relating to Fig.4) and (B-D) antibody binding to transfected HEK cell, MDA-MB-231 cells, MET-CHO cells, and Jurkat cells, respectively (relating to Fig.5a-c).

# Supplementary Tables

Supplementary Table S1. Amino acid sequences of the peptides used in the grafting

| name    | target                   | original RaPID peptide <sup>a</sup> | sequence used for grafting <sup>b</sup> | Ref        |
|---------|--------------------------|-------------------------------------|-----------------------------------------|------------|
| PB1m6   | Plexin B1                | Ac-wRPRVARWTGQIIYC                  | WRPRVARWTGQIIY                          | (1)        |
| PB1m6A9 | Plexin B1                | Ac-wRPYIERWTGRLIVC                  | WRPYIERWTGRLIV                          | (2)        |
| PB1m7   | Plexin B1                | Ac-wNSNVLSWQTYSWYC                  | (C)NSNVLSWQTYSWY(C)                     | (1)        |
| aMD4    | MET                      | Ac-yRQFNRRTHEVWNLD                  | YRQFNRRTHEVWNLD                         | (3)        |
| aMD5    | MET                      | Ac-yWYYAWDQTYKAFPC                  | YWYYAWDQTYKAFP                          | (3)        |
| A6-2f   | EGFR                     | Ac-BASFPEELDEWYVAYGC                | (C)ASFPEELDEWYVAYG(C)                   | this study |
| tkD5    | TrkB                     | Ac-yRQASPKFTFWSC                    | (C)YRQASPKFTFWS(C)                      | this study |
| IB8     | integrin $\alpha6\beta1$ | Ac-YLVKRSGLYTVDC                    | YLVKRSGLYTVDC                           | this study |
| PA tag  | NZ-1 antibody            | n/a                                 | GVAMPGAEDDVV                            | (4)        |

<sup>a</sup> By convention, RaPID peptides are cyclized via the *N*-chloroacetyl group of the initiator amino acid and the sulfhydryl group of the terminal Cys. The small letter indicates *D*-amino acids, and B represents an unnatural amino acid *L*-boronophenylalanine.

<sup>b</sup> Flanking Cys residues (parenthesis) were added in some peptides to increase the binding capacity of the grafted proteins.

(1) Matsunaga et al., *Cell Chem. Biol.*, 23, 1341-1350 (2016)

(2) Bashiruddin et al., *Proc. Natl. Acad. Sci. U.S.A.*, 117, 31070-31077 (2020)

(3) Ito et al. *Nature Commun.*, 6, 6373 (2015)

(4) Fujii et al., *Protein Exp. Purif.*, 95, 240 (2014)

## Supplementary Table S2. Scaffold proteins and insertion sites used for the peptide grafting

| protein       | length | SCOP domain(fold)                               | graft site | flanking sequence <sup>a</sup> |
|---------------|--------|-------------------------------------------------|------------|--------------------------------|
| Fn10          | 93     | Fn3( $\beta$ -sandwich)                         | s1         | ...ISWDAP//VTVRY..             |
|               |        |                                                 | s2         | ...YAVTGR//SPASSK....          |
| VHH           | 115    | IgV( $\beta$ -sandwich)                         | s1         | ...WVAGMS//RSSYED...           |
|               |        |                                                 | s2         | ...YCNVNV//FEYWGQ...           |
| SIRP $\alpha$ | 118    | IgV( $\beta$ -sandwich)                         | s1         | ...ELIYNQ//KEGHFP...           |
|               |        |                                                 | s2         | ...KFRKG//PDTEFK...            |
| CEA           | 108    | IgV( $\beta$ -sandwich)                         | s1         | ...IIGYVI//QQATPG...           |
|               |        |                                                 | s2         | ...TLHVIK//LVNEEA...           |
| Fc            | 227    | IgC( $\beta$ -sandwich)                         | s1         | ...VVDVSH//DPEVKF...           |
|               |        |                                                 | s2         | ...PREEQY//NSTYRV...           |
|               |        |                                                 | s3         | ...SNKALP//PIEKTI...           |
|               |        |                                                 | s4         | ...TISKAK//QPREPQ...           |
|               |        |                                                 | s5         | ...PPVLDS//GSFFLY...           |
|               |        |                                                 | s6         | ...RDELTK//QVSLTC...           |
|               |        |                                                 | s7         | ...AVEWES//GQPENN...           |
|               |        |                                                 | s8         | ...KSRWQQ//NVFSCS...           |
| HSA           | 590    | albumin(all $\alpha$ )                          | s1         | ...TCVADE//AENC DK...          |
|               |        |                                                 | s2         | ...TECCQA//DKAA CL...          |
|               |        |                                                 | s3         | ...EKCCAA//DPHECY...           |
|               |        |                                                 | s4         | ...EKCKKA//DKETCF...           |
| hGH           | 185    | 4-helix cytokine<br>(helical bundle)            | s1         | ...RLED//SPRTGQ...             |
|               |        |                                                 | s2         | ...DTNSHN//DALLKN...           |
| RBP           | 201    | lipocalin( $\beta$ -barrel)                     | s1         | ...GRVRL//NNWDVC...            |
|               |        |                                                 | s2         | ...KYWGVA//SFLQKG...           |
| ALP           | 489    | alkaline phosphatase-like<br>( $\alpha/\beta$ ) | s1         | ...GPGYVL//GARPDV...           |
| Cap<br>(AAV2) | 533    | n/a                                             | s1         | ...RTNTPS//TTQSRL...           |
|               |        |                                                 | s2         | ...TNLQRG//QAATAD...           |
| Cap<br>(AAV1) | 534    | n/a                                             | s1         | ...RTQNQS//AQNKDL...           |
|               |        |                                                 | s2         | ...VNFQSS//DPATGD...           |

<sup>a</sup> RaPID-derived peptides (shown in Table S1) are inserted in the position indicated by "//", with up to 3 linker residues.

**Supplementary Table S3. Primer sequences used for extension PCR**

| Relevant construct | Primer name    | Strand    | Sequence(5'- 3')                                      |
|--------------------|----------------|-----------|-------------------------------------------------------|
| UG2-m6             | UG-Fwd3        | sense     | TGGACCGGACAGATCATTACGAGATCTGCCCTTCCTCCAACGCG          |
|                    | UG-Rev3(-)     | antisense | TCTCGCACCCTAGGCCGCAATTACACAGTGAGCTTTGGGCTATT          |
| UG2-m6A9           | mP69-Fwd24     | sense     | GTGGACAGGAAGGTTGATCGTGGGTTGCCCTTCCTCCAACGCGTG         |
|                    | mP69-Rev24(-)  | antisense | CTCTCGATGTAAGGCCGCCAACACACAGTGAGCTTTGGGCTATTT         |
| UG(CS)2-m6A9       | mP69-Fwd23     | sense     | GTGGACAGGAAGGTTGATCGTGGGTAGCCCTTCCTCCAACGCG           |
|                    | mP69-Rev23(-)  | antisense | CTCTCGATGTAAGGCCGCCAACCGGACAGTGAGCTTTGGGCTA           |
| UG2-m7             | P7ds-Fwd10     | sense     | GGCAAATTACAGCTGGTATTGCGGTAGCCCTTCCTTCC                |
|                    | P7ds-Rev10(-)  | antisense | AGGACAGCACGTTAGAATTGCAACCGGACAGTGAGCTTTG              |
| UG2-aMD4           | MD4-Fwd21      | sense     | CACGAGGTGTGGAAGTTGATTGCGGTAGCCCTTCCTTCC               |
|                    | MD4-Rev21(-)   | antisense | CGTAGCCTGTTGAACTGCCGCAACCGGACAGTGAGCTTTG              |
| UG2-aMD5           | MD5-Fwd13      | sense     | AGACCTACAAAGCCTTCCGTGCGGTAGCCCTTCCTTCC                |
|                    | MD5-Rev13(-)   | antisense | GATCCCAAGCATAGTACCAGCAACCGGACAGTGAGCTTTG              |
| Fn10(m6A9_s1)      | Fn10-Fwd1      | sense     | TAGCCGTCTCGGATCTGTACAGTGAGATATTAC                     |
|                    | Fn10_rev1(-)   | antisense | GCCGTCTCGCCCTAGGAGCATCCAGCTGATC                       |
| Fn10(aMD4_s1)      | Fn10-Fwd2      | sense     | AGCCGTCTCGGATCTAGCCCCGAAGCAGCAAGC                     |
|                    | Fn10_rev2(-)   | antisense | AGCCGTCTCGCCCTACGGCCAGTGACAGCATAAC                    |
| Fn10(m6A9_s2)      | FnmP69-Fwd1    | sense     | AGGAAGGTTGATCGTAGCCCCGCAAGCAGCAAGCC                   |
|                    | FnmP69-Rev1(-) | antisense | GTCCACCTCTCGATGTAAGGCCGCCAACGGCCAGTGAC                |
| Fn10(aMD4_s2)      | FnMD4-Fwd1     | sense     | GCACGAGGTGTGGAAGTTGGATGGCAGCCCCGAAGCAGCAAGC           |
|                    | FnMD4-Rev1(-)  | antisense | GTACGCCTGTTGAACTGCCTATAGCCTCCACGGCCAGTGACAGC          |
| SIRPa(m6A9_s1)     | mP69-Fwd34     | sense     | GGTGGACAGGAAGGTTGATCGTGGGCGGCAAAGAAGGCCACTTCCCCCG     |
|                    | mP69-Rev34(-)  | antisense | TCTCGATGTAAGGCCGCCAGCCTTGATTGTAGATTAATTCCC            |
| SIRPa(m6A9_s2)     | mP69-Fwd35     | sense     | GCTGGACAGGAAGGTTGATCGTGGGCGGCCCTGCACACGGAG            |
|                    | mP69-Rev35(-)  | antisense | TCTCGATGTAAGGCCGCCAGCCGCTCCCTTCCGGAAGCTTC             |
| SIRPa(aMD4_s1)     | MD4-Fwd28      | sense     | GCACGAGGTGTGGAAGTTGGATGGCGGATCTAAAGAAGGCCACTTCCCCCG   |
|                    | MD4-Rev28(-)   | antisense | GTACGCCTGTTGAACTGCCTATAGCCGCCGCTTATTGTAGATTAATTCCC    |
| SIRPa(aMD4_s2)     | MD4-Fwd29      | sense     | CGTAGCCTGTTGAACTGCCTATAGCCGCCGCTCCCTTCCGGAAGCTTC      |
|                    | MD4-Rev29(-)   | antisense | CACGAGGTGTGGAAGTTGGATGGCGGATCTCTGCACACGGAG            |
| CEA(m6A9_s1)       | mP69-Fwd35     | sense     | TGGACAGGAAGGTTGATCGTGGGATCTCAACAAGCTACCCAGGG          |
|                    | mP69-Rev35(-)  | antisense | CCTCTCGATGTAAGGCCGCCAACGGCCGCTTATTACATATCCTATAAATTTG  |
| CEA(m6A9_s2)       | mP69-Fwd36     | sense     | TGGACAGGAAGGTTGATCGTGGGATCTTGTGAATGAAGAAGCAAC         |
|                    | mP69-Rev36(-)  | antisense | CCTCTCGATGTAAGGCCGCCAACGGCCGCTTTTATGACGTGAGGGTG       |
| CEA(aMD4_s1)       | MD4-Fwd30      | sense     | GCACGAGGTGTGGAAGTTGGATGGCGGATCTCAACAAGCTACCCAGGG      |
|                    | MD4-Rev30(-)   | antisense | GTACGCCTGTTGAACTGCCTATAGCCGCCGCTTATTACATATCCTATAATTTG |
| CEA(aMD4_s2)       | MD4-Fwd31      | sense     | GCACGAGGTGTGGAAGTTGGATGGCGGATCTTGTGAATGAAGAAGCAAC     |
|                    | MD4-Rev31(-)   | antisense | GTACGCCTGTTGAACTGCCTATAGCCGCCGCTTTTATGACGTGAGGGTG     |
| VHH(m6A9_s1)       | Nb-Fwd7        | sense     | TGGACAGGAAGGTTGATCGTAGGTCGCTCCTACGAAGACTC             |
|                    | Nb-Rev7(-)     | antisense | CCTCTCGATGTAAGGCCGCCATCCCGAGGACATTCCTGCCACC           |
| VHH(m6A9_s2)       | Nb-Fwd9        | sense     | AGGTGGACAGGAAGGTTGATCGTGGGCTTCGAGTATTGGG              |
|                    | Nb-Rev9(-)     | antisense | CTCGATGTAAGGCCGCCAGCCACGTTGACGTTACAATAG               |
| VHH(aMD4_s1)       | Nb-Fwd8        | sense     | ACGAGGTGTGGAAGTTGGATGGAGGTCGCTCCTACGAAGACTC           |
|                    | Nb-Rev8(-)     | antisense | GCGTACGCCTGTTGAACTGCCTATATCCAGCCGAGGACATTCCTG         |
| VHH(aMD4_s2)       | Nb-Fwd10       | sense     | ACGCACGAGGTGTGGAAGTTGGATGGGGCTTCGAGTATTGGGGCC         |
|                    | Nb-Rev10(-)    | antisense | ACGCCTGTTGAACTGCCTATAAGAGCCACGTTGACGTTACAATAG         |
| Fc(m6A9_s1)        | mP69-Fwd4      | sense     | GGACAGGAAGGTTGATCGTGGGCGGAGACCCTGAGGTCAAGTTC          |
|                    | mP69-Rev4(-)   | antisense | ACCTCTCGATGTAAGGCCGCCAGCCGTGGCTCACGTCCACCACC          |
| Fc(m6A9_s2)        | mP69-Fwd2      | sense     | TGGACAGGAAGGTTGATCGTGGGCAACAGCAGTACCGGTGGG            |
|                    | mP69-Rev2(-)   | antisense | CCTCTCGATGTAAGGCCGCCAGCCGTAAGTCTCCTCCCGCGGC           |
| Fc(m6A9_s3)        | mP69-Fwd3      | sense     | TGGACAGGAAGGTTGATCGTGGGCCCCATCGAGAAAACCATCTC          |
|                    | mP69-Rev3(-)   | antisense | CCTCTCGATGTAAGGCCGCCAGCCGTTGGAGGGCTTTGTTGGAG          |
| Fc(m6A9_s4)        | mP69-Fwd32     | sense     | GGACAGGAAGGTTGATCGTGGGAGGGCAGCCCGAGAACCAC             |
|                    | mP69-Rev32(-)  | antisense | ACCTCTCGATGTAAGGCCGCCACCCTTTGGCTTTGGAGATGG            |
| Fc(m6A9_s5)        | mP69-Fwd33     | sense     | TGGACAGGAAGGTTGATCGTGGGCGGCTCCTTCTCTACAG              |
|                    | mP69-Rev33(-)  | antisense | CCTCTCGATGTAAGGCCGCCACCAGGAGTCCAGCAGGGAGGC            |
| Fc(m6A9_s6)        | mP69-Fwd9      | sense     | GGACAGGAAGGTTGATCGTGGGCGGCCAGGTCAGCCTGACCTGC          |
|                    | mP69-Rev9(-)   | antisense | ACCTCTCGATGTAAGGCCGCCAGCCCTTGGTCAGCTCATCCCGG          |
| Fc(m6A9_s7)        | mP69-Fwd10     | sense     | GGACAGGAAGGTTGATCGTGGGCGGTGGGCGAGCCGGAGAAAC           |
|                    | mP69-Rev10(-)  | antisense | ACCTCTCGATGTAAGGCCGCCAGCCGCTCTCCACTCCACGGCG           |
| Fc(m6A9_s8)        | mP69-Fwd11     | sense     | GGACAGGAAGGTTGATCGTGGGGGGAACGTCTTCTCATGC              |
|                    | mP69-Rev11(-)  | antisense | ACCTCTCGATGTAAGGCCGCCACCCTGCTGCCACCTGCTC              |
| Fc(aMD4_s1)        | MD4-Fwd4       | sense     | CGCACGAGGTGTGGAAGTTGGATGGCGGAGACCCTGAGGTCAAGTTC       |
|                    | MD4-Rev4(-)    | antisense | TACGCCTGTTGAACTGCCTATAGCCTCCGTGGCTCACGTCCACCACC       |
| Fc(aMD4_s2)        | MD4-Fwd2       | sense     | GCACGAGGTGTGGAAGTTGGATGGCAGCAACAGCAGTACCGTGTGG        |
|                    | MD4-Rev2(-)    | antisense | GTACGCCTGTTGAACTGCCTATAGCCTCCGTAAGTCTCCTCCCGCGGC      |
| Fc(aMD4_s3)        | MD4-Fwd3       | sense     | GCACGAGGTGTGGAAGTTGGATGGCAGCCCATCGAGAAAACCATCTC       |
|                    | MD4-Rev3(-)    | antisense | GTACGCCTGTTGAACTGCCTATAGCCTCCTGGGAGGGCTTTGTTGGAG      |

|              |               |           |                                                          |
|--------------|---------------|-----------|----------------------------------------------------------|
| Fc(aMD4_s4)  | MD4-Fwd26     | sense     | ACGCACGAGGTGTGGAACCTGGATGGAGGGCAGCCCCGAGAACC             |
|              | MD4-Rev26(-)  | antisense | ACGCCTGTTGAACTGCCTATAGCCCCCTTTGGCTTTGGAGATGG             |
| Fc(aMD4_s5)  | MD4-Fwd27     | sense     | ACGCACGAGGTGTGGAACCTGGATGGCGGCTCCTTCTCTCTAC              |
|              | MD4-Rev27(-)  | antisense | ACGCCTGTTGAACTGCCTATAGCCCCGGAGTCCAGCACGGGAG              |
| Fc(aMD4_s6)  | MD4-Fwd5      | sense     | CGCACGAGGTGTGGAACCTGGATGGCGGCCAGGTCAGCCTGACCTGC          |
|              | MD4-Rev5(-)   | antisense | TACGCCTGTTGAACTGCCTATAGCTCCCTTGGTCAGCTCATCCCGG           |
| Fc(aMD4_s7)  | MD4-Fwd6      | sense     | CGCACGAGGTGTGGAACCTGGATGGCGGTGGGCAGCCGGAGAACAAC          |
|              | MD4-Rev6(-)   | antisense | TACGCCTGTTGAACTGCCTATAGCTCCGCTCTCCCACTCCACGGCG           |
| Fc(aMD4_s8)  | MD4-Fwd7      | sense     | CGCACGAGGTGTGGAACCTGGATGGGGGGAACGCTTCTTCATGC             |
|              | MD4-Rev7(-)   | antisense | TACGCCTGTTGAACTGCCTATATCCCCCTGCTGCCACCTGCTC              |
| Fc(m7_s8)    | P7ds-Fwd8     | sense     | GCAAACCTACAGCTGGTATTGTGGATCGGGGAACGCTCTTCTC              |
|              | P7ds-Rev8(-)  | antisense | CAGGACAGCACGTTAGAATTGCAGCCGCTCCCTGCTGCCAC                |
| Fc(aMD5_s8)  | MD5-Fwd9      | sense     | CAGACCTACAAAGCCTTTCCTGATCGGGGAACGCTTCTTCATGC             |
|              | MD5-Rev9(-)   | antisense | ATCCCAAGCATAGTACCAATAGCCGCTCCCTGCTGCCACCTGCTC            |
| Fc(A6-2f_s8) | A62f-Fwd7     | sense     | ATGAGTGGTACGTGGCTTATGGTTGTGGATCGGGGAACGTC                |
|              | A62f-Rev7(-)  | antisense | CCAGCTCTTCAGGGAAAGAGGGCGCAGCCGCTCCCTGCTGCC               |
| Fc(tkD5_s8)  | tkD5-Fwd8     | sense     | AAAGTTCACCTTTTGGAGTTGTGGATCGGGGAACGTC                    |
|              | tkD5-Rev8(-)  | antisense | GGGGAAGCCTGGCGGTAGCAGCCGCTCCCTGCTGCC                     |
| Fc(IB8_s8)   | IB8-Fwd1      | sense     | GTGGTTGTATACCGTGGACGGGGATCTAACGCTTCTTCATG                |
|              | IB8-Rev1(-)   | antisense | CCGTTCTTTTGACGAGGTATCCGCGCTCTGTGCCACCTG                  |
| Fc(A6-2f_s6) | A62f-Fwd6     | sense     | ATGAGTGGTACGTGGCTTATGGTTGTGGAGGCTCCAGGTCAGC              |
|              | A62f-Rev6(-)  | antisense | CCAGCTCTTCAGGGAAAGAGGGCGCAGCCCTCCGCTCTTGGTCAGC           |
| hGH(m6A9_s1) | mP69-Fwd13    | sense     | TGGACAGGAAGGTTGATCGTGGGCAGCCCCGGACTGGGC                  |
|              | mP69-Rev13(-) | antisense | CCTCTCGATGTAAGGCCGCCAGCCATCTTCCAGCCTCTGC                 |
| hGH(m6A9_s2) | mP69-Fwd14    | sense     | TGGACAGGAAGGTTGATCGTGGGTGACGCACTACTCAAGAAC               |
|              | mP69-Rev14(-) | antisense | CCTCTCGATGTAAGGCCGCCAGCCGTTGTGTGAGTTTGTGTC               |
| hGH(aMD4_s1) | MD4-Fwd40     | sense     | CGCACGAGGTGTGGAACCTGGACGGGGGACGCCCGGACTG                 |
|              | MD4-Rev40(-)  | antisense | TACGCCTGTTGAACTGCCTATATCCGGAGCCATCTTCCAGC                |
| hGH(aMD4_s2) | MD4-Fwd41     | sense     | CGCACGAGGTGTGGAACCTGGACGGGGGTGACGCACTACTC                |
|              | MD4-Rev41(-)  | antisense | TACGCCTGTTGAACTGCCTATATCCGGAGCCGTTGTGTGAG                |
| HSA(m6A9_s1) | mP69-Fwd5     | sense     | TGGACAGGAAGGTTGATCGTGGCGGAGCTGAAAATTGTGACAAATC           |
|              | mP69-Rev5(-)  | antisense | CCTCTCGATGTAAGGCCGCCAGCCCTCATCAGCAACACATGTTTTTG          |
| HSA(m6A9_s2) | mP69-Fwd6     | sense     | TGGACAGGAAGGTTGATCGTGGCGGTGATAAAGCTGCCTGCCTGTTG          |
|              | mP69-Rev6(-)  | antisense | CCTCTCGATGTAAGGCCGCCAGCCAGCTTGGCAACATTCTGTA AAAAG        |
| HSA(m6A9_s3) | mP69-Fwd7     | sense     | TGGACAGGAAGGTTGATCGTGGCGGAGATCCTCATGAATGCTATG            |
|              | mP69-Rev7(-)  | antisense | CCTCTCGATGTAAGGCCGCCAGCCAGCGGCACAGCACTTCTCTAG            |
| HSA(m6A9_s4) | mP69-Fwd8     | sense     | TGGACAGGAAGGTTGATCGTGGCGGGGATAAGGAGACCTGCTTTG            |
|              | mP69-Rev8(-)  | antisense | CCTCTCGATGTAAGGCCGCCAGCCAGCCTTGACGCACTTCTCTAC            |
| HSA(aMD4_s1) | MD4-Fwd8      | sense     | CGCACGAGGTGTGGAACCTGGATGGGTGAGCTGAAAATTGTGAC             |
|              | MD4-Rev8(-)   | antisense | TACGCCTGTTGAACTGCCTATAGCTGACTATCAGCAACACATG              |
| HSA(aMD4_s2) | MD4-Fwd9      | sense     | GCACGAGGTGTGGAACCTGGATGGGCTGATAAAGCTGCCTGCCTG            |
|              | MD4-Rev9(-)   | antisense | GTACGCCTGTTGAACTGCCTATAGCCAGCAGCTTGGCAACATTCTG           |
| HSA(aMD4_s3) | MD4-Fwd10     | sense     | CACGAGGTGTGGAACCTGGATGGCTCAGATCCTCATGAATGCTATG           |
|              | MD4-Rev10(-)  | antisense | CGTACGCCTGTTGAACTGCCTATAGCTGCAGCGGCACAGCACTTC            |
| HSA(aMD4_s4) | MD4-Fwd11     | sense     | GCACGAGGTGTGGAACCTGGATGGCGGCATAAGGAGACCTGCTTTG           |
|              | MD4-Rev11(-)  | antisense | GTACGCCTGTTGAACTGCCTATAGCTCCAGCCTTGACGCACTTCTC           |
| RBP(m6A9_s1) | mP69-Fwd19    | sense     | TGGACAGGAAGGTTGATCGTGGGGAATAACTGGGACGTGTGCG              |
|              | mP69-Rev19(-) | antisense | CCTCTCGATGTAAGGCCGCCAGCCAAAAGACGGACTCGGCC                |
| RBP(m6A9_s2) | mP69-Fwd20    | sense     | GGACAGGAAGGTTGATCGTGGGCTCCTTTCTCCAGAAAGGAAATG            |
|              | mP69-Rev20(-) | antisense | ACCTCTCGATGTAAGGCCGCCAGCCGGCTACGCCCAAGTACTTC             |
| RBP(aMD4_s1) | MD4-Fwd42     | sense     | CGCACGAGGTGTGGAACCTGGACGGGGGAATAACTGGGACGTG              |
|              | MD4-Rev42(-)  | antisense | TACGCCTGTTGAACTGCCTATATCCGCCAAAAGACGGACTCGGC             |
| RBP(aMD4_s2) | MD4-Fwd43     | sense     | CGCACGAGGTGTGGAACCTGGACGGGCTCCTTTCTCCAGAAAGG             |
|              | MD4-Rev43(-)  | antisense | TACGCCTGTTGAACTGCCTATATCCGCCGGTACGCCCAAGTAC              |
| ALP(m6A9_s1) | mP69-Fwd18    | sense     | TGGACAGGAAGGTTGATCGTGGGAGGGACGGCGCCCGCCGGATG             |
|              | mP69-Rev18(-) | antisense | CCTCTCGATGTAAGGCCGCCAGCCCTCCCTTGGACATAGCCTGG             |
| ALP(aMD4_s1) | MD4-Fwd16     | sense     | GCACGAGGTGTGGAACCTGGATGGAGGGGACGGCGCCCGGC                |
|              | MD4-Rev16(-)  | antisense | GTACGCCTGTTGAACTGCCTATAGCTCCCTTGGACACATAG                |
| PA_s2_AAV1   | PAins-Fwd     | sense     | GCCGAAGATGATGTGGTGGGATCTGACCCTGCGAC                      |
|              | PAins-Rev(-)  | antisense | ACCTGGCATGGCAACGCCCGCTGCTGCTCTGAAAATTG                   |
| aMD4_s2_AAV1 | MD4-Fwd40     | sense     | GCGCGGCTATAGGCAGTTCAACAGGGCGCACGACGAGGTGTGGAACCTGGATGGCG |
|              | MD4-Rev40(-)  | antisense | GATCCGCCATCCAAGTTCACACCTCGTGCCTGCGCCTGTTGAACTGCCTATAGCCG |
| PA_s1_AAV2   | pa-Fwd1       | sense     | CCGAAGATGATGTGGTGGGCACCACGAGTCAAGGCTTC                   |
|              | pa-Rev1(-)    | antisense | CACCTGGCATGGCAACGCCCTCCACTGGAGTGTGTTGTTTC                |
| PA_s2_AAV2   | pa-Fwd2       | sense     | CCGAAGATGATGTGGTGGGACAAGCAGTACCAGCAGATG                  |
|              | pa-Rev2(-)    | antisense | CACCTGGCATGGCAACGCCCTCTCTGGAGGTTGGTAG                    |
| m6A9_s2_AAV2 | mP69-Fwd25    | sense     | GGACAGGAAGGTTGATCGTGGGCACCACGAGTCAAGGCTTC                |
|              | mP69-Rev25(-) | antisense | ACCTCTCGATGTAAGGCCGCCATCCACTTGGAGTGTGTTGTTTC             |



**Supplementary Table S4. Primer sequences used for mutagenesis**

| Relevant construct | Primer name    | Strand    | Sequence(5'- 3')                   |
|--------------------|----------------|-----------|------------------------------------|
| pRC2-mi342_AgeI    | pCR2mi342mut1+ | sense     | GATGCTGCGTACCGGtAACAACTTTACCTTCAG  |
|                    | pCR2mi342mut1- | antisense | CTGAAGGTAAAGTTGTTaCCGGTACGCAGCATC  |
| pRC2-mi342_NheI    | pCR2mi342mut2+ | sense     | GCGGCAAAGTTTGCTagCTTCATCACACAGTAC  |
|                    | pCR2mi342mut2- | antisense | GTACTGTGTGATGAAGetAGCAAACCTTTGCCGC |
